# Supplementary material
Source: PubMed Central journal article supplement (PMC3400714)
Supplement: NIHMS388401-supplement-Supplemental_Table.pdf [file NIHMS388401-supplement-Supplemental_Table.pdf]

**Supplementary Table. Donor Characteristics: comparison of donors with and without ECGs**

|                               | <b>Donors with ECGs</b> | <b>Donors without ECGs</b> | <b>p-value*</b> |
|-------------------------------|-------------------------|----------------------------|-----------------|
|                               | n=980                   | n=391                      |                 |
| <b>Demographics</b>           |                         |                            |                 |
| Age (years)                   | 37.8 ± 13.9             | 43.3 ± 14.2                | <0.001          |
| Sex (Male)                    | 617 (63%)               | 243 (62%)                  | 0.8             |
| Cause of death                |                         |                            | <0.001          |
| Anoxia                        | 92 (9%)                 | 61 (16%)                   |                 |
| Cerebrovascular               | 455 (47%)               | 194 (50%)                  |                 |
| Head trauma                   | 424 (43%)               | 130 (33%)                  |                 |
| Central nervous system tumor  | 5 (0.5%)                | 1 (0.3%)                   |                 |
| Other                         | 3 (0.3%)                | 4 (1%)                     |                 |
| Race                          |                         |                            | 0.03            |
| Caucasian                     | 536 (55%)               | 233 (60%)                  |                 |
| Hispanic                      | 249 (25%)               | 84 (22%)                   |                 |
| African-American              | 109 (11%)               | 34 (9%)                    |                 |
| Asian                         | 59 (6%)                 | 35 (9%)                    |                 |
| Other                         | 27 (3%)                 | 5 (1%)                     |                 |
| Height (cm)                   | 171 ± 11                | 171 ± 12                   | 0.3             |
| Weight (kg)                   | 79 ± 20                 | 82 ± 41                    | 0.1             |
| <b>Clinical history</b>       |                         |                            |                 |
| Cardiopulmonary Resuscitation | 203 (21%)               | 88 (23%)                   | 0.5             |
| Defibrillation                | 66 (7%)                 | 36 (9%)                    | 0.08            |
| Smoking                       | 526 (55%)               | 211 (55%)                  | 0.9             |
| Cocaine/Amphetamines          | 255 (28%)               | 82 (21%)                   | 0.2             |
| Hypertension                  | 252 (26%)               | 132 (34%)                  | 0.003           |
| Diabetes                      | 63 (7%)                 | 45 (12%)                   | 0.001           |
| Coronary artery disease       | 26 (3%)                 | 25 (7%)                    | 0.001           |
| <b>Laboratory values</b>      |                         |                            |                 |
| Troponin (peak) ≥ 1.0 mcg/L   | 312 (34%)               | 120 (37%)                  | 0.3             |
| <b>Vasoactive Medications</b> |                         |                            |                 |
| Dopamine (mcg/kg/min)         | 811 (83%)               | 277 (71%)                  | <0.001          |
| Peak dopamine                 | 6.3 ± 4.9               | 6.6 ± 6.3                  | 0.4             |
| Final dopamine                | 2.1 ± 2.2               | 2.4 ± 2.6                  | 0.02            |
| Neosynephrine (mcg/min)       | 801 (82%)               | 264 (68%)                  | <0.001          |
| Peak neosynephrine            | 107 ± 93                | 93 ± 91                    | 0.01            |
| Final neosynephrine           | 27 ± 41                 | 28 ± 41                    | 0.6             |
| Epinephrine                   | 38 (4%)                 | 13 (4%)                    | 0.6             |
| Norepinephrine                | 51 (8%)                 | 16 (6%)                    | 0.3             |

|                                        |           |           |        |
|----------------------------------------|-----------|-----------|--------|
| Esmolol                                | 190 (21%) | 58 (15%)  | 0.03   |
| <b><i>Hormonal therapy</i></b>         |           |           |        |
| Corticosteroids                        | 977 (99%) | 352 (91%) | <0.001 |
| Methylprednisolone ( per 24 hrs)       | 2.2 ± 1.0 | 2.1 ± 1.0 | 0.1    |
| Thyroxine                              | 189 (21%) | 46 (12%)  | 0.001  |
| <b><i>Echocardiogram</i></b>           |           |           |        |
| Echocardiogram performed               | 899 (93%) | 171 (44%) | <0.001 |
| Left ventricular ejection fraction (%) | 62 ± 12   | 61 ± 12   | 0.5    |
| Regional wall motion abnormalities     | 175 (20%) | 34 (21%)  | 0.7    |
| Left ventricular hypertrophy†          | 453 (54%) | 90 (60%)  | 0.2    |

\* transplanted vs non-transplanted hearts

†septal or posterior wall thickness > 1.1 cm
